# Supplementary material for: Global Burden of Chronic Obstructive Pulmonary Disease Through 2050
Source: PubMed Central journal article supplement — JAMA Netw Open. 2023 Dec 7;6(12):e2346598. doi: 10.1001/jamanetworkopen.2023.46598 (PMC10704283; doi:10.1001/jamanetworkopen.2023.46598), 2023-12-07
Supplement: jamanetwopen-e2346598-s001.pdf [file jamanetwopen-e2346598-s001.pdf]

## Supplemental Online Content

Boers E, Barrett M, Su JG, et al. Income and sex disparities in the global burden of chronic obstructive pulmonary disease through 2050. *JAMA Netw Open*. 2023;6(12):e2346598. doi:10.1001/jamanetworkopen.2023.46598

**eAppendix 1.** Risk Factor Data Sources

**eAppendix 2.** GAM Model Fit

**eAppendix 3.** Regional COPD Prevalence (2020-2050) and 95% CIs

This supplemental material has been provided by the authors to give readers additional information about their work.

## eAppendix 1. Risk Factor Data Sources

**eTable 1. Data sources of the risk factors included in the models**

| <b>Risk Factor</b>                                             | <b>Source</b>                                              | <b>Metric</b>                                                                | <b>Time period</b> | <b>Geographical distribution</b> |
|----------------------------------------------------------------|------------------------------------------------------------|------------------------------------------------------------------------------|--------------------|----------------------------------|
| <b>COPD prevalence</b>                                         | Adeloye et al. (2022)                                      | Prevalence (%), GOLD                                                         | 2019               | national, regional, global       |
| <b>Population by age, gender</b>                               | World Bank                                                 | Population numbers                                                           | 1960-2050          | national, regional, global       |
| <b>Human Development Index (HDI)</b>                           | Frederick S. Pardee<br>Center for International<br>Futures | Index varying between 0<br>– 100                                             | 1990-2050          | national                         |
| <b>Smoking prevalence</b>                                      | Global Burden of<br>Disease Study 2019<br>(GBD, 2019)      | Smoking tobacco use<br>prevalence                                            | 1990-2019          | national, regional, global       |
| <b>Ambient particulate matter pollution (PM<sub>2.5</sub>)</b> | Global Burden of<br>Disease Study 2019<br>(GBD, 2019)      | Annual mean PM <sub>2.5</sub><br>concentrations (µg/m <sup>3</sup> )         | 1990-2019          | national, regional, global       |
| <b>Household air pollution exposure</b>                        | Global Burden of<br>Disease Study 2019<br>(GBD, 2019)      | % of population exposed<br>to household air<br>pollution from solid<br>fuels | 1990-2019          | national, regional, global       |
| <b>Ambient ozone pollution</b>                                 | Global Burden of<br>Disease Study 2019<br>(GBD, 2019)      | Annual mean ambient<br>ozone pollution (parts<br>per billion)                | 1990-2019          | national, regional, global       |

## eAppendix 2. GAM Model Fit

### Model fit and model performance

Below, a table (eTable2) containing the results from the fitting procedure of the GAMs. The default maximum degrees of freedom for the smoothers used in the model are sufficient for all predictors. The effective degrees of freedom (EDF) for all estimated smoothers are below their maximum possible value ( $k$ ). The  $k$ -index is a measurement of the remaining pattern in the residuals, and the  $p$ -value is calculated based on the distribution of the  $k$ -index after randomizing the order of the residuals. Ideally,  $k$  should have a value that is equal to or greater than 1. However, provided that the  $k$ -index value is not restrictively low,  $k$  is not critical, because the effective degrees of freedom of a term are primarily controlled by the smoothing penalty, which is a main feature of a GAM.

**eTable 2. GAMs estimating COPD prevalence among females/males (25+) from 2020-2050**

|                        | Year       | Smoking    | HDI         | PM <sub>2.5</sub> | Ozone      | HAP        |
|------------------------|------------|------------|-------------|-------------------|------------|------------|
| <b>Female GAM</b>      |            |            |             |                   |            |            |
| $k^*$                  | 9.00       | 9.00       | 9.00        | 6.00              | 6.00       | 9.00       |
| EDF                    | 3.21       | 1.00       | 1.08        | 3.81              | 5.01       | 2.93       |
| $k$ -index, $p$ value  | 1.00, 0.53 | 1.14, 0.88 | 1.03, 0.55  | 0.79, 0.03        | 0.87, 0.17 | 1.10, 0.82 |
| <b>Male GAM</b>        |            |            |             |                   |            |            |
| $k^*$                  | 9.00       | 9.00       | 2.00        | 9.00              | 9.00       | 9.00       |
| EDF                    | 1.91       | 1.00       | 1.00        | 5.29              | 4.52       | 3.35       |
| $k$ -index, $p$ value) | 1.05, 0.59 | 0.85, 0.13 | 0.69, 0.005 | 0.94, 0.28        | 1.04, 0.58 | 0.85, 0.09 |

Note. HDI = human development index, HAP = household air pollution, PM<sub>2.5</sub> = particulate matter 2.5, EDF = effective degrees of freedom

**eTable 3. Evaluation of GAMs estimating COPD prevalence among females/males (25+) from 2020-2050**

|                   | R <sup>2</sup> | Deviance | MSE   | RMSE | AIC     | BIC     |
|-------------------|----------------|----------|-------|------|---------|---------|
| <b>Female GAM</b> | 0.92           | 0.88     | 0.007 | 0.08 | -255.19 | -188.25 |
| <b>Male GAM</b>   | 0.99           | 0.99     | 0.07  | 0.26 | 55.64   | 125.05  |

Note. R<sup>2</sup> = R squared, MSE = mean squared error, RMSE = root mean squared error, AIC = akaikie information criterion, BIC = bayesian information criterion. R<sup>2</sup>/Deviance; a value of >0.75 shows satisfactory prediction accuracy, MSE; values closer to zero represent greater prediction accuracy, RMSE; values between 0.2 and 0.5 show satisfactory prediction accuracy.

### eAppendix 3. Regional COPD Prevalence (2020-2050) and 95% CIs

**eTable 4. Regional COPD prevalence (%) from 2020-2050 across females**

| Year | Region              | Prevalence (%) | Upper 95% CI | Lower 95% CI |
|------|---------------------|----------------|--------------|--------------|
| 2020 | East Asia & Pacific | 5.12           | 5.14         | 5.10         |
| 2021 | East Asia & Pacific | 5.06           | 5.09         | 5.04         |
| 2022 | East Asia & Pacific | 5.24           | 5.25         | 5.22         |
| 2023 | East Asia & Pacific | 5.18           | 5.19         | 5.16         |
| 2024 | East Asia & Pacific | 5.12           | 5.14         | 5.11         |
| 2025 | East Asia & Pacific | 5.30           | 5.32         | 5.29         |
| 2026 | East Asia & Pacific | 5.25           | 5.26         | 5.24         |
| 2027 | East Asia & Pacific | 5.19           | 5.20         | 5.18         |
| 2028 | East Asia & Pacific | 5.14           | 5.15         | 5.12         |
| 2029 | East Asia & Pacific | 5.08           | 5.09         | 5.07         |
| 2030 | East Asia & Pacific | 5.27           | 5.29         | 5.26         |
| 2031 | East Asia & Pacific | 5.22           | 5.23         | 5.21         |
| 2032 | East Asia & Pacific | 5.16           | 5.17         | 5.15         |
| 2033 | East Asia & Pacific | 5.11           | 5.12         | 5.09         |
| 2034 | East Asia & Pacific | 5.31           | 5.32         | 5.30         |
| 2035 | East Asia & Pacific | 5.25           | 5.26         | 5.24         |
| 2036 | East Asia & Pacific | 5.20           | 5.21         | 5.19         |
| 2037 | East Asia & Pacific | 5.14           | 5.15         | 5.13         |
| 2038 | East Asia & Pacific | 5.08           | 5.10         | 5.07         |
| 2039 | East Asia & Pacific | 5.29           | 5.30         | 5.28         |

|      |                       |      |      |      |
|------|-----------------------|------|------|------|
| 2040 | East Asia & Pacific   | 5.23 | 5.24 | 5.22 |
| 2041 | East Asia & Pacific   | 5.18 | 5.19 | 5.17 |
| 2042 | East Asia & Pacific   | 5.12 | 5.13 | 5.11 |
| 2043 | East Asia & Pacific   | 5.06 | 5.08 | 5.05 |
| 2044 | East Asia & Pacific   | 5.27 | 5.28 | 5.25 |
| 2045 | East Asia & Pacific   | 5.21 | 5.22 | 5.20 |
| 2046 | East Asia & Pacific   | 5.15 | 5.17 | 5.14 |
| 2047 | East Asia & Pacific   | 5.10 | 5.11 | 5.08 |
| 2048 | East Asia & Pacific   | 5.04 | 5.05 | 5.03 |
| 2049 | East Asia & Pacific   | 5.23 | 5.26 | 5.21 |
| 2050 | East Asia & Pacific   | 5.18 | 5.20 | 5.16 |
| 2020 | Europe & Central Asia | 7.55 | 7.58 | 7.52 |
| 2021 | Europe & Central Asia | 7.85 | 7.86 | 7.83 |
| 2022 | Europe & Central Asia | 7.79 | 7.81 | 7.78 |
| 2023 | Europe & Central Asia | 7.74 | 7.75 | 7.72 |
| 2024 | Europe & Central Asia | 7.68 | 7.69 | 7.67 |
| 2025 | Europe & Central Asia | 7.97 | 7.98 | 7.95 |
| 2026 | Europe & Central Asia | 7.91 | 7.92 | 7.90 |
| 2027 | Europe & Central Asia | 7.85 | 7.86 | 7.84 |
| 2028 | Europe & Central Asia | 7.80 | 7.81 | 7.79 |
| 2029 | Europe & Central Asia | 7.74 | 7.75 | 7.73 |
| 2030 | Europe & Central Asia | 7.69 | 7.70 | 7.67 |
| 2031 | Europe & Central Asia | 7.95 | 7.96 | 7.94 |
| 2032 | Europe & Central Asia | 7.89 | 7.90 | 7.88 |

|      |                       |      |      |      |
|------|-----------------------|------|------|------|
| 2033 | Europe & Central Asia | 7.84 | 7.85 | 7.83 |
| 2034 | Europe & Central Asia | 7.78 | 7.79 | 7.77 |
| 2035 | Europe & Central Asia | 7.72 | 7.74 | 7.71 |
| 2036 | Europe & Central Asia | 7.96 | 7.97 | 7.95 |
| 2037 | Europe & Central Asia | 7.91 | 7.92 | 7.90 |
| 2038 | Europe & Central Asia | 7.85 | 7.86 | 7.84 |
| 2039 | Europe & Central Asia | 7.79 | 7.80 | 7.78 |
| 2040 | Europe & Central Asia | 7.74 | 7.75 | 7.73 |
| 2041 | Europe & Central Asia | 7.68 | 7.69 | 7.67 |
| 2042 | Europe & Central Asia | 7.88 | 7.90 | 7.87 |
| 2043 | Europe & Central Asia | 7.83 | 7.84 | 7.82 |
| 2044 | Europe & Central Asia | 7.77 | 7.78 | 7.76 |
| 2045 | Europe & Central Asia | 7.72 | 7.73 | 7.70 |
| 2046 | Europe & Central Asia | 7.66 | 7.67 | 7.65 |
| 2047 | Europe & Central Asia | 7.60 | 7.61 | 7.59 |
| 2048 | Europe & Central Asia | 7.76 | 7.78 | 7.75 |
| 2049 | Europe                | 7.71 | 7.73 | 7.69 |
| 2050 | Europe                | 7.66 | 7.67 | 7.63 |
| 2020 | MENA                  | 6.82 | 6.85 | 6.80 |
| 2021 | MENA                  | 6.77 | 6.79 | 6.74 |
| 2022 | MENA                  | 6.87 | 6.88 | 6.85 |
| 2023 | MENA                  | 6.81 | 6.83 | 6.79 |
| 2024 | MENA                  | 6.75 | 6.77 | 6.74 |
| 2025 | MENA                  | 6.98 | 7.00 | 6.97 |

|      |      |      |      |      |
|------|------|------|------|------|
| 2026 | MENA | 6.93 | 6.94 | 6.92 |
| 2027 | MENA | 6.87 | 6.88 | 6.86 |
| 2028 | MENA | 6.81 | 6.83 | 6.80 |
| 2029 | MENA | 6.76 | 6.77 | 6.75 |
| 2030 | MENA | 6.98 | 7.01 | 6.99 |
| 2031 | MENA | 6.94 | 6.95 | 6.93 |
| 2032 | MENA | 6.88 | 6.89 | 6.87 |
| 2033 | MENA | 6.83 | 6.84 | 6.82 |
| 2034 | MENA | 6.77 | 6.78 | 6.76 |
| 2035 | MENA | 6.99 | 7.00 | 6.98 |
| 2036 | MENA | 6.93 | 6.94 | 6.92 |
| 2037 | MENA | 6.87 | 6.89 | 6.86 |
| 2038 | MENA | 6.82 | 6.83 | 6.81 |
| 2039 | MENA | 6.76 | 6.77 | 6.75 |
| 2040 | MENA | 6.95 | 6.97 | 6.95 |
| 2041 | MENA | 6.90 | 6.91 | 6.89 |
| 2042 | MENA | 6.84 | 6.86 | 6.83 |
| 2043 | MENA | 6.79 | 6.80 | 6.78 |
| 2044 | MENA | 6.97 | 6.98 | 6.95 |
| 2045 | MENA | 6.91 | 6.92 | 6.90 |
| 2046 | MENA | 6.85 | 6.87 | 6.84 |
| 2047 | MENA | 6.80 | 6.81 | 6.79 |
| 2048 | MENA | 6.74 | 6.75 | 6.73 |
| 2049 | MENA | 6.91 | 6.93 | 6.88 |



|      |               |       |       |       |
|------|---------------|-------|-------|-------|
| 2050 | MENA          | 6.85  | 6.87  | 6.83  |
| 2020 | North America | 14.95 | 14.98 | 14.92 |
| 2021 | North America | 15.01 | 15.03 | 15.00 |
| 2022 | North America | 14.96 | 14.97 | 14.94 |
| 2023 | North America | 14.90 | 14.91 | 14.89 |
| 2024 | North America | 14.84 | 14.85 | 14.83 |
| 2025 | North America | 14.79 | 14.80 | 14.78 |
| 2026 | North America | 14.73 | 14.74 | 14.72 |
| 2027 | North America | 14.67 | 14.69 | 14.66 |
| 2028 | North America | 14.62 | 14.63 | 14.61 |
| 2029 | North America | 14.56 | 14.57 | 14.55 |
| 2030 | North America | 14.58 | 14.59 | 14.57 |
| 2031 | North America | 14.52 | 14.54 | 14.51 |
| 2032 | North America | 14.47 | 14.48 | 14.46 |
| 2033 | North America | 14.41 | 14.42 | 14.40 |
| 2034 | North America | 14.36 | 14.36 | 14.35 |
| 2035 | North America | 14.30 | 14.31 | 14.29 |
| 2036 | North America | 14.24 | 14.25 | 14.23 |
| 2037 | North America | 14.19 | 14.20 | 14.18 |
| 2038 | North America | 14.13 | 14.14 | 14.12 |
| 2039 | North America | 14.12 | 14.14 | 14.11 |
| 2040 | North America | 14.07 | 14.08 | 14.06 |
| 2041 | North America | 14.01 | 14.02 | 14.00 |
| 2042 | North America | 13.95 | 13.97 | 13.94 |

|      |                           |       |       |       |
|------|---------------------------|-------|-------|-------|
| 2043 | North America             | 13.90 | 13.91 | 13.89 |
| 2044 | North America             | 13.84 | 13.85 | 13.83 |
| 2045 | North America             | 13.79 | 13.80 | 13.77 |
| 2046 | North America             | 13.73 | 13.74 | 13.72 |
| 2047 | North America             | 13.67 | 13.69 | 13.66 |
| 2048 | North America             | 13.66 | 13.68 | 13.64 |
| 2049 | North America             | 13.60 | 13.62 | 13.58 |
| 2050 | North America             | 13.52 | 13.56 | 13.52 |
| 2020 | Latin America & Caribbean | 10.15 | 10.17 | 10.13 |
| 2021 | Latin America & Caribbean | 10.10 | 10.12 | 10.08 |
| 2022 | Latin America & Caribbean | 10.04 | 10.06 | 10.02 |
| 2023 | Latin America & Caribbean | 10.20 | 10.21 | 10.18 |
| 2024 | Latin America & Caribbean | 10.14 | 10.15 | 10.13 |
| 2025 | Latin America & Caribbean | 10.08 | 10.09 | 10.07 |
| 2026 | Latin America & Caribbean | 10.03 | 10.04 | 10.01 |
| 2027 | Latin America & Caribbean | 10.18 | 10.19 | 10.17 |
| 2028 | Latin America & Caribbean | 10.12 | 10.13 | 10.11 |
| 2029 | Latin America & Caribbean | 10.07 | 10.08 | 10.06 |
| 2030 | Latin America & Caribbean | 10.01 | 10.02 | 10.00 |
| 2031 | Latin America & Caribbean | 9.95  | 9.96  | 9.94  |
| 2032 | Latin America & Caribbean | 10.11 | 10.12 | 10.10 |
| 2033 | Latin America & Caribbean | 10.05 | 10.06 | 10.04 |
| 2034 | Latin America & Caribbean | 9.99  | 10.00 | 9.98  |
| 2035 | Latin America & Caribbean | 9.94  | 9.95  | 9.93  |

|      |                           |       |       |       |
|------|---------------------------|-------|-------|-------|
| 2036 | Latin America & Caribbean | 9.88  | 9.89  | 9.87  |
| 2037 | Latin America & Caribbean | 10.03 | 10.04 | 10.02 |
| 2038 | Latin America & Caribbean | 9.98  | 9.99  | 9.97  |
| 2039 | Latin America & Caribbean | 9.92  | 9.93  | 9.91  |
| 2040 | Latin America & Caribbean | 9.86  | 9.87  | 9.85  |
| 2041 | Latin America & Caribbean | 9.81  | 9.82  | 9.80  |
| 2042 | Latin America & Caribbean | 9.96  | 9.97  | 9.95  |
| 2043 | Latin America & Caribbean | 9.90  | 9.91  | 9.89  |
| 2044 | Latin America & Caribbean | 9.85  | 9.86  | 9.83  |
| 2045 | Latin America & Caribbean | 9.79  | 9.80  | 9.78  |
| 2046 | Latin America & Caribbean | 9.73  | 9.74  | 9.72  |
| 2047 | Latin America & Caribbean | 9.68  | 9.69  | 9.66  |
| 2048 | Latin America & Caribbean | 9.83  | 9.85  | 9.81  |
| 2049 | Latin America & Caribbean | 9.77  | 9.79  | 9.75  |
| 2050 | Latin America & Caribbean | 9.72  | 9.73  | 9.70  |
| 2020 | South Asia                | 6.82  | 6.85  | 6.79  |
| 2021 | South Asia                | 6.93  | 6.95  | 6.92  |
| 2022 | South Asia                | 6.88  | 6.89  | 6.86  |
| 2023 | South Asia                | 6.82  | 6.84  | 6.80  |
| 2024 | South Asia                | 6.94  | 6.95  | 6.92  |
| 2025 | South Asia                | 6.88  | 6.90  | 6.87  |
| 2026 | South Asia                | 7.00  | 7.01  | 6.98  |
| 2027 | South Asia                | 6.94  | 6.95  | 6.92  |
| 2028 | South Asia                | 6.88  | 6.90  | 6.87  |

|      |            |       |       |       |
|------|------------|-------|-------|-------|
| 2029 | South Asia | 6.98  | 7.00  | 6.97  |
| 2030 | South Asia | 6.93  | 6.94  | 6.91  |
| 2031 | South Asia | 7.01  | 7.03  | 7.00  |
| 2032 | South Asia | 6.96  | 6.97  | 6.94  |
| 2033 | South Asia | 6.90  | 6.92  | 6.89  |
| 2034 | South Asia | 6.97  | 6.99  | 6.96  |
| 2035 | South Asia | 6.92  | 6.93  | 6.90  |
| 2036 | South Asia | 6.86  | 6.87  | 6.85  |
| 2037 | South Asia | 6.91  | 6.93  | 6.90  |
| 2038 | South Asia | 6.86  | 6.87  | 6.84  |
| 2039 | South Asia | 6.80  | 6.81  | 6.79  |
| 2040 | South Asia | 6.83  | 6.85  | 6.82  |
| 2041 | South Asia | 6.78  | 6.79  | 6.76  |
| 2042 | South Asia | 6.72  | 6.74  | 6.71  |
| 2043 | South Asia | 6.74  | 6.75  | 6.72  |
| 2044 | South Asia | 6.68  | 6.69  | 6.67  |
| 2045 | South Asia | 6.62  | 6.64  | 6.61  |
| 2046 | South Asia | 6.63  | 6.65  | 6.61  |
| 2047 | South Asia | 6.57  | 6.59  | 6.56  |
| 2048 | South Asia | 6.52  | 6.53  | 6.50  |
| 2049 | South Asia | 6.46  | 6.48  | 6.44  |
| 2050 | South Asia | 6.50  | 6.53  | 6.48  |
| 2020 | SSA        | 13.74 | 13.76 | 13.71 |
| 2021 | SSA        | 13.68 | 13.71 | 13.66 |

|      |     |       |       |       |
|------|-----|-------|-------|-------|
| 2022 | SSA | 14.13 | 14.14 | 14.11 |
| 2023 | SSA | 14.07 | 14.09 | 14.05 |
| 2024 | SSA | 14.50 | 14.52 | 14.49 |
| 2025 | SSA | 14.45 | 14.46 | 14.43 |
| 2026 | SSA | 14.39 | 14.40 | 14.37 |
| 2027 | SSA | 14.80 | 14.82 | 14.78 |
| 2028 | SSA | 14.74 | 14.76 | 14.73 |
| 2029 | SSA | 15.13 | 15.14 | 15.11 |
| 2030 | SSA | 15.07 | 15.09 | 15.05 |
| 2031 | SSA | 15.43 | 15.44 | 15.41 |
| 2032 | SSA | 15.37 | 15.39 | 15.36 |
| 2033 | SSA | 15.32 | 15.33 | 15.30 |
| 2034 | SSA | 15.63 | 15.64 | 15.61 |
| 2035 | SSA | 15.57 | 15.59 | 15.55 |
| 2036 | SSA | 15.79 | 15.80 | 15.77 |
| 2037 | SSA | 15.73 | 15.75 | 15.71 |
| 2038 | SSA | 15.81 | 15.82 | 15.79 |
| 2039 | SSA | 15.75 | 15.77 | 15.74 |
| 2040 | SSA | 15.69 | 15.71 | 15.68 |
| 2041 | SSA | 15.69 | 15.70 | 15.67 |
| 2042 | SSA | 15.63 | 15.65 | 15.61 |
| 2043 | SSA | 15.57 | 15.59 | 15.55 |
| 2044 | SSA | 15.51 | 15.53 | 15.50 |
| 2045 | SSA | 15.41 | 15.42 | 15.39 |

|      |     |       |       |       |
|------|-----|-------|-------|-------|
| 2046 | SSA | 15.35 | 15.37 | 15.33 |
| 2047 | SSA | 15.20 | 15.22 | 15.19 |
| 2048 | SSA | 15.15 | 15.17 | 15.13 |
| 2049 | SSA | 15.09 | 15.11 | 15.07 |
| 2050 | SSA | 14.92 | 14.95 | 14.88 |

**Note.** MENA = Middle East & North Africa, SSA = Sub-Saharan Africa, CI = confidence interval

**eTable 5. Regional COPD prevalence (%) from 2020-2050 across males**

| <b>Year</b> | <b>Region</b>       | <b>Prevalence (%)</b> | <b>Upper 95% CI</b> | <b>Lower 95% CI</b> |
|-------------|---------------------|-----------------------|---------------------|---------------------|
| 2020        | East Asia & Pacific | 12.03                 | 12.42               | 11.64               |
| 2021        | East Asia & Pacific | 11.89                 | 12.36               | 11.42               |
| 2022        | East Asia & Pacific | 11.85                 | 12.48               | 11.23               |
| 2023        | East Asia & Pacific | 11.72                 | 12.42               | 11.01               |
| 2024        | East Asia & Pacific | 11.58                 | 12.38               | 10.77               |
| 2025        | East Asia & Pacific | 11.53                 | 12.51               | 10.55               |
| 2026        | East Asia & Pacific | 11.39                 | 12.47               | 10.32               |
| 2027        | East Asia & Pacific | 11.25                 | 12.43               | 10.08               |
| 2028        | East Asia & Pacific | 11.11                 | 12.39               | 9.84                |
| 2029        | East Asia & Pacific | 10.97                 | 12.35               | 9.60                |
| 2030        | East Asia & Pacific | 10.94                 | 12.49               | 9.38                |
| 2031        | East Asia & Pacific | 10.80                 | 12.45               | 9.14                |
| 2032        | East Asia & Pacific | 10.66                 | 12.42               | 8.90                |
| 2033        | East Asia & Pacific | 10.52                 | 12.38               | 8.66                |
| 2034        | East Asia & Pacific | 10.49                 | 12.53               | 8.45                |
| 2035        | East Asia & Pacific | 10.35                 | 12.49               | 8.21                |

|      |                       |       |       |       |
|------|-----------------------|-------|-------|-------|
| 2036 | East Asia & Pacific   | 10.21 | 12.46 | 7.97  |
| 2037 | East Asia & Pacific   | 10.08 | 12.42 | 7.73  |
| 2038 | East Asia & Pacific   | 9.94  | 12.39 | 7.48  |
| 2039 | East Asia & Pacific   | 9.92  | 12.55 | 7.29  |
| 2040 | East Asia & Pacific   | 9.78  | 12.52 | 7.05  |
| 2041 | East Asia & Pacific   | 9.64  | 12.48 | 6.80  |
| 2042 | East Asia & Pacific   | 9.50  | 12.45 | 6.56  |
| 2043 | East Asia & Pacific   | 9.36  | 12.42 | 6.31  |
| 2044 | East Asia & Pacific   | 9.36  | 12.59 | 6.14  |
| 2045 | East Asia & Pacific   | 9.23  | 12.55 | 5.90  |
| 2046 | East Asia & Pacific   | 9.09  | 12.52 | 5.65  |
| 2047 | East Asia & Pacific   | 8.95  | 12.49 | 5.41  |
| 2048 | East Asia & Pacific   | 8.81  | 12.45 | 5.16  |
| 2049 | East Asia & Pacific   | 8.82  | 12.63 | 5.01  |
| 2050 | East Asia & Pacific   | 8.68  | 12.60 | 4.77  |
| 2020 | Europe & Central Asia | 13.18 | 13.53 | 12.82 |
| 2021 | Europe & Central Asia | 13.44 | 13.89 | 12.99 |
| 2022 | Europe & Central Asia | 13.30 | 13.84 | 12.75 |
| 2023 | Europe & Central Asia | 13.16 | 13.80 | 12.51 |
| 2024 | Europe & Central Asia | 13.02 | 13.77 | 12.27 |
| 2025 | Europe & Central Asia | 13.28 | 14.16 | 12.40 |
| 2026 | Europe & Central Asia | 13.14 | 14.12 | 12.16 |
| 2027 | Europe & Central Asia | 13.00 | 14.09 | 11.91 |
| 2028 | Europe & Central Asia | 12.86 | 14.05 | 11.67 |

|      |                       |       |       |       |
|------|-----------------------|-------|-------|-------|
| 2029 | Europe & Central Asia | 12.72 | 14.02 | 11.42 |
| 2030 | Europe & Central Asia | 12.58 | 13.99 | 11.17 |
| 2031 | Europe & Central Asia | 12.84 | 14.38 | 11.30 |
| 2032 | Europe & Central Asia | 12.70 | 14.35 | 11.05 |
| 2033 | Europe & Central Asia | 12.56 | 14.32 | 10.81 |
| 2034 | Europe & Central Asia | 12.42 | 14.29 | 10.56 |
| 2035 | Europe & Central Asia | 12.29 | 14.26 | 10.31 |
| 2036 | Europe & Central Asia | 12.55 | 14.66 | 10.44 |
| 2037 | Europe & Central Asia | 12.41 | 14.63 | 10.19 |
| 2038 | Europe & Central Asia | 12.27 | 14.60 | 9.94  |
| 2039 | Europe & Central Asia | 12.13 | 14.57 | 9.69  |
| 2040 | Europe & Central Asia | 11.99 | 14.54 | 9.45  |
| 2041 | Europe & Central Asia | 11.85 | 14.51 | 9.20  |
| 2042 | Europe & Central Asia | 12.12 | 14.92 | 9.33  |
| 2043 | Europe & Central Asia | 11.98 | 14.89 | 9.08  |
| 2044 | Europe & Central Asia | 11.85 | 14.86 | 8.83  |
| 2045 | Europe & Central Asia | 11.71 | 14.83 | 8.58  |
| 2046 | Europe & Central Asia | 11.57 | 14.80 | 8.34  |
| 2047 | Europe & Central Asia | 11.43 | 14.77 | 8.09  |
| 2048 | Europe & Central Asia | 11.70 | 15.18 | 8.22  |
| 2049 | Europe & Central Asia | 11.56 | 15.15 | 7.97  |
| 2050 | Europe & Central Asia | 11.42 | 15.12 | 7.72  |
| 2020 | MENA                  | 11.82 | 12.18 | 11.45 |
| 2021 | MENA                  | 11.68 | 12.13 | 11.23 |



|      |      |       |       |       |
|------|------|-------|-------|-------|
| 2022 | MENA | 11.67 | 12.21 | 11.12 |
| 2023 | MENA | 11.53 | 12.17 | 10.88 |
| 2024 | MENA | 11.39 | 12.13 | 10.64 |
| 2025 | MENA | 11.45 | 12.32 | 10.58 |
| 2026 | MENA | 11.31 | 12.28 | 10.34 |
| 2027 | MENA | 11.17 | 12.25 | 10.09 |
| 2028 | MENA | 11.03 | 12.22 | 9.84  |
| 2029 | MENA | 10.89 | 12.19 | 9.59  |
| 2030 | MENA | 10.97 | 12.40 | 9.54  |
| 2031 | MENA | 10.83 | 12.37 | 9.29  |
| 2032 | MENA | 10.69 | 12.34 | 9.04  |
| 2033 | MENA | 10.55 | 12.31 | 8.80  |
| 2034 | MENA | 10.41 | 12.28 | 8.55  |
| 2035 | MENA | 10.50 | 12.50 | 8.50  |
| 2036 | MENA | 10.36 | 12.47 | 8.25  |
| 2037 | MENA | 10.22 | 12.44 | 8.00  |
| 2038 | MENA | 10.08 | 12.41 | 7.75  |
| 2039 | MENA | 9.94  | 12.38 | 7.50  |
| 2040 | MENA | 10.04 | 12.61 | 7.46  |
| 2041 | MENA | 9.90  | 12.58 | 7.21  |
| 2042 | MENA | 9.76  | 12.55 | 6.96  |
| 2043 | MENA | 9.62  | 12.53 | 6.71  |
| 2044 | MENA | 9.73  | 12.77 | 6.68  |
| 2045 | MENA | 9.59  | 12.74 | 6.44  |

|      |               |       |       |       |
|------|---------------|-------|-------|-------|
| 2046 | MENA          | 9.45  | 12.71 | 6.19  |
| 2047 | MENA          | 9.31  | 12.68 | 5.94  |
| 2048 | MENA          | 9.17  | 12.65 | 5.69  |
| 2049 | MENA          | 9.30  | 12.92 | 5.68  |
| 2050 | MENA          | 9.16  | 12.89 | 5.43  |
| 2020 | North America | 18.84 | 19.24 | 18.44 |
| 2021 | North America | 19.08 | 19.54 | 18.63 |
| 2022 | North America | 18.95 | 19.50 | 18.39 |
| 2023 | North America | 18.81 | 19.46 | 18.15 |
| 2024 | North America | 18.67 | 19.43 | 17.90 |
| 2025 | North America | 18.53 | 19.40 | 17.66 |
| 2026 | North America | 18.39 | 19.37 | 17.41 |
| 2027 | North America | 18.25 | 19.34 | 17.16 |
| 2028 | North America | 18.11 | 19.31 | 16.91 |
| 2029 | North America | 17.97 | 19.28 | 16.66 |
| 2030 | North America | 18.20 | 19.64 | 16.75 |
| 2031 | North America | 18.06 | 19.62 | 16.50 |
| 2032 | North America | 17.92 | 19.59 | 16.25 |
| 2033 | North America | 17.78 | 19.56 | 16.00 |
| 2034 | North America | 17.64 | 19.53 | 15.75 |
| 2035 | North America | 17.50 | 19.50 | 15.50 |
| 2036 | North America | 17.36 | 19.48 | 15.25 |
| 2037 | North America | 17.22 | 19.45 | 15.00 |
| 2038 | North America | 17.09 | 19.42 | 14.75 |

|      |                           |       |       |       |
|------|---------------------------|-------|-------|-------|
| 2039 | North America             | 17.30 | 19.78 | 14.82 |
| 2040 | North America             | 17.16 | 19.75 | 14.57 |
| 2041 | North America             | 17.02 | 19.72 | 14.32 |
| 2042 | North America             | 16.88 | 19.69 | 14.07 |
| 2043 | North America             | 16.74 | 19.67 | 13.82 |
| 2044 | North America             | 16.60 | 19.64 | 13.57 |
| 2045 | North America             | 16.46 | 19.61 | 13.32 |
| 2046 | North America             | 16.32 | 19.58 | 13.07 |
| 2047 | North America             | 16.19 | 19.56 | 12.81 |
| 2048 | North America             | 16.37 | 19.89 | 12.85 |
| 2049 | North America             | 16.23 | 19.86 | 12.60 |
| 2050 | North America             | 16.09 | 19.83 | 12.35 |
| 2020 | Latin America & Caribbean | 16.72 | 17.09 | 16.36 |
| 2021 | Latin America & Caribbean | 16.58 | 17.04 | 16.13 |
| 2022 | Latin America & Caribbean | 16.45 | 17.00 | 15.89 |
| 2023 | Latin America & Caribbean | 16.23 | 16.89 | 15.57 |
| 2024 | Latin America & Caribbean | 16.09 | 16.85 | 15.33 |
| 2025 | Latin America & Caribbean | 15.95 | 16.82 | 15.09 |
| 2026 | Latin America & Caribbean | 15.81 | 16.79 | 14.84 |
| 2027 | Latin America & Caribbean | 15.65 | 16.74 | 14.55 |
| 2028 | Latin America & Caribbean | 15.51 | 16.71 | 14.31 |
| 2029 | Latin America & Caribbean | 15.37 | 16.68 | 14.06 |

|      |                           |       |       |       |
|------|---------------------------|-------|-------|-------|
| 2030 | Latin America & Caribbean | 15.23 | 16.65 | 13.81 |
| 2031 | Latin America & Caribbean | 15.09 | 16.62 | 13.56 |
| 2032 | Latin America & Caribbean | 14.97 | 16.62 | 13.32 |
| 2033 | Latin America & Caribbean | 14.83 | 16.59 | 13.07 |
| 2034 | Latin America & Caribbean | 14.69 | 16.56 | 12.82 |
| 2035 | Latin America & Caribbean | 14.55 | 16.53 | 12.57 |
| 2036 | Latin America & Caribbean | 14.41 | 16.50 | 12.32 |
| 2037 | Latin America & Caribbean | 14.33 | 16.55 | 12.12 |
| 2038 | Latin America & Caribbean | 14.19 | 16.52 | 11.87 |
| 2039 | Latin America & Caribbean | 14.05 | 16.49 | 11.62 |
| 2040 | Latin America & Caribbean | 13.92 | 16.46 | 11.37 |
| 2041 | Latin America & Caribbean | 13.78 | 16.43 | 11.12 |
| 2042 | Latin America & Caribbean | 13.73 | 16.51 | 10.95 |
| 2043 | Latin America & Caribbean | 13.59 | 16.48 | 10.70 |
| 2044 | Latin America & Caribbean | 13.45 | 16.45 | 10.45 |
| 2045 | Latin America & Caribbean | 13.31 | 16.43 | 10.20 |
| 2046 | Latin America & Caribbean | 13.17 | 16.40 | 9.95  |
| 2047 | Latin America & Caribbean | 13.03 | 16.37 | 9.70  |
| 2048 | Latin America & Caribbean | 13.02 | 16.48 | 9.55  |
| 2049 | Latin America &           | 12.88 | 16.45 | 9.30  |

|      |                           |       |       |       |
|------|---------------------------|-------|-------|-------|
|      | Caribbean                 |       |       |       |
| 2050 | Latin America & Caribbean | 12.74 | 16.42 | 9.05  |
| 2020 | South Asia                | 11.70 | 12.07 | 11.32 |
| 2021 | South Asia                | 11.71 | 12.23 | 11.19 |
| 2022 | South Asia                | 11.57 | 12.16 | 10.98 |
| 2023 | South Asia                | 11.43 | 12.11 | 10.76 |
| 2024 | South Asia                | 11.43 | 12.28 | 10.58 |
| 2025 | South Asia                | 11.29 | 12.23 | 10.36 |
| 2026 | South Asia                | 11.27 | 12.40 | 10.14 |
| 2027 | South Asia                | 11.13 | 12.34 | 9.92  |
| 2028 | South Asia                | 10.99 | 12.29 | 9.69  |
| 2029 | South Asia                | 10.94 | 12.45 | 9.44  |
| 2030 | South Asia                | 10.80 | 12.40 | 9.21  |
| 2031 | South Asia                | 10.72 | 12.54 | 8.91  |
| 2032 | South Asia                | 10.59 | 12.48 | 8.69  |
| 2033 | South Asia                | 10.45 | 12.43 | 8.46  |
| 2034 | South Asia                | 10.33 | 12.54 | 8.13  |
| 2035 | South Asia                | 10.19 | 12.49 | 7.90  |
| 2036 | South Asia                | 10.06 | 12.44 | 7.67  |
| 2037 | South Asia                | 9.91  | 12.50 | 7.31  |
| 2038 | South Asia                | 9.77  | 12.45 | 7.08  |
| 2039 | South Asia                | 9.63  | 12.40 | 6.85  |
| 2040 | South Asia                | 9.44  | 12.42 | 6.45  |

|      |            |       |       |       |
|------|------------|-------|-------|-------|
| 2041 | South Asia | 9.30  | 12.37 | 6.23  |
| 2042 | South Asia | 9.16  | 12.32 | 6.00  |
| 2043 | South Asia | 8.93  | 12.30 | 5.56  |
| 2044 | South Asia | 8.79  | 12.25 | 5.34  |
| 2045 | South Asia | 8.65  | 12.20 | 5.11  |
| 2046 | South Asia | 8.41  | 12.15 | 4.66  |
| 2047 | South Asia | 8.27  | 12.10 | 4.43  |
| 2048 | South Asia | 8.13  | 12.05 | 4.20  |
| 2049 | South Asia | 7.99  | 12.00 | 3.97  |
| 2050 | South Asia | 7.82  | 12.00 | 3.63  |
| 2020 | SSA        | 17.36 | 17.77 | 16.95 |
| 2021 | SSA        | 17.22 | 17.71 | 16.74 |
| 2022 | SSA        | 17.20 | 17.83 | 16.57 |
| 2023 | SSA        | 17.06 | 17.77 | 16.35 |
| 2024 | SSA        | 17.04 | 17.94 | 16.14 |
| 2025 | SSA        | 16.90 | 17.89 | 15.92 |
| 2026 | SSA        | 16.76 | 17.84 | 15.69 |
| 2027 | SSA        | 16.78 | 18.07 | 15.49 |
| 2028 | SSA        | 16.64 | 18.02 | 15.26 |
| 2029 | SSA        | 16.70 | 18.30 | 15.09 |
| 2030 | SSA        | 16.56 | 18.25 | 14.87 |
| 2031 | SSA        | 16.63 | 18.55 | 14.72 |
| 2032 | SSA        | 16.49 | 18.49 | 14.49 |
| 2033 | SSA        | 16.35 | 18.44 | 14.26 |

|      |     |       |       |       |
|------|-----|-------|-------|-------|
| 2034 | SSA | 16.42 | 18.74 | 14.11 |
| 2035 | SSA | 16.28 | 18.69 | 13.88 |
| 2036 | SSA | 16.33 | 18.98 | 13.69 |
| 2037 | SSA | 16.19 | 18.92 | 13.46 |
| 2038 | SSA | 16.23 | 19.21 | 13.24 |
| 2039 | SSA | 16.09 | 19.15 | 13.02 |
| 2040 | SSA | 15.95 | 19.10 | 12.79 |
| 2041 | SSA | 15.99 | 19.36 | 12.61 |
| 2042 | SSA | 15.85 | 19.31 | 12.39 |
| 2043 | SSA | 15.89 | 19.55 | 12.24 |
| 2044 | SSA | 15.75 | 19.49 | 12.01 |
| 2045 | SSA | 15.79 | 19.70 | 11.87 |
| 2046 | SSA | 15.65 | 19.65 | 11.65 |
| 2047 | SSA | 15.66 | 19.82 | 11.49 |
| 2048 | SSA | 15.52 | 19.77 | 11.27 |
| 2049 | SSA | 15.38 | 19.72 | 11.04 |
| 2050 | SSA | 15.35 | 19.85 | 10.86 |

**Note.** MENA = Middle East & North Africa, SSA = Sub-Saharan Africa, CI = confidence interval
