# Supplementary material for: Global Burden of Chronic Obstructive Pulmonary Disease Through 2050
Source: PubMed Central journal article supplement — JAMA Netw Open. 2023 Dec 7;6(12):e2346598. doi: 10.1001/jamanetworkopen.2023.46598 (PMC10704283; doi:10.1001/jamanetworkopen.2023.46598), 2023-12-07
Supplement: jamanetwopen-e2346598-s002.pdf [file jamanetwopen-e2346598-s002.pdf]

## Data Sharing Statement

Boers. Income and Sex Disparities in the Global Burden of Chronic Obstructive Pulmonary Disease Through 2050. *JAMA Netw Open*. Published December 07, 2023.

doi:10.1001/jamanetworkopen.2023.46598

### Data

**Data available:** Yes

**Data types:** Data (not involving human participants)

**How to access data:** [Elroy.Boers@ResMed.com](mailto:Elroy.Boers@ResMed.com)

**When available:** With publication

### Supporting Documents

**Document types:** Statistical/analytic code

**How to access documents:** [Elroy.Boers@ResMed.com](mailto:Elroy.Boers@ResMed.com)

**When available:** With publication

### Additional Information

**Who can access the data:** anyone requesting the data

**Types of analyses:** for any purpose

**Mechanisms of data availability:** investigator support

**Any additional restrictions:** none
